# Supplementary material
Source: MDPI journal article supplement (https://www.mdpi.com/2221-3759/10/4/41)

Figure S1

**A**  
***slit3* genomic sequence**

ATCAGCCTCAGAGGATATATG<sup>1</sup>ATGCGGTGGGTAAAGTATTGGGGGACAGTGGCTGTGCTCTGCGGGCTGCTGAGCTGT  
GCTGTGAATGGATGCCCCGCATAAGTGCAGTTGTTTCGGGCTCTCATGTGGATTGTCAGGGTCAAGCCTTCAAGACGGTG  
CCTAGGGGAATCCCGAGGAATGCCGAGAGACT//CCCTGTGGGC<sup>167 13712</sup>ATCTGGTGCTGTTGAGGCAC<sup>13919</sup>TGCCAGGGAGCCTC  
TGTGTTTAAAGATCTCTGTTTACTGACTCTGCTGTGAGCTTAGACTTGAAAAATCATGTTTGAAAGCATAAGTGAAATG  
AAAAGCTTTTAACTTCTCTTAACCATCCTCTCTCCCTTTCTCTTTCCAGGGATCTGGACAGGAATAACATCACCCGG  
ATCACCA<sup>13919</sup>AAGTGGACTTCTCTGGCCTCAAGAACCTGCGCGTGCTGTAAGATGTCACCTCTGTATCTCTCACTCTCATGG  
TTAATCCATCCTTTAACTCCCAAGTGCCCTCCTCTTCTTGTGTCTTTATTGTCAAAGCCATCAAAGGGTTCAAG  
CTGAAAGCTGGGAGGATTACAGCACAAGTAATAATAAAACAACTGACATTTCACTGAGTAAATCTGACACATTTAA

**B**  
***slit3* mRNA**

5' cap 5' UTR ATG coding region 3' UTR poly-A

1  
ATGCGGTGGGTAAAGTATTGGGGGACAGTGGCTGTGCTCTGCGGGCTGCTGAGCTGTGCTGTGAATGGATGCCCCGCAT  
AAGTGCAGTTGTTTCGGGCTCTCATGTGGATTGTCAGGGTCAAGCCTTCAAGACGGTGCCTAGGGGAATCCCGAGGAAT  
GCCGAGAGACTGGATCTGGACAGGAATAACATCACCCGGATCACCA<sup>206</sup>AAGTGGACTTCTCTGGCCTCAAGAACCTGCGC

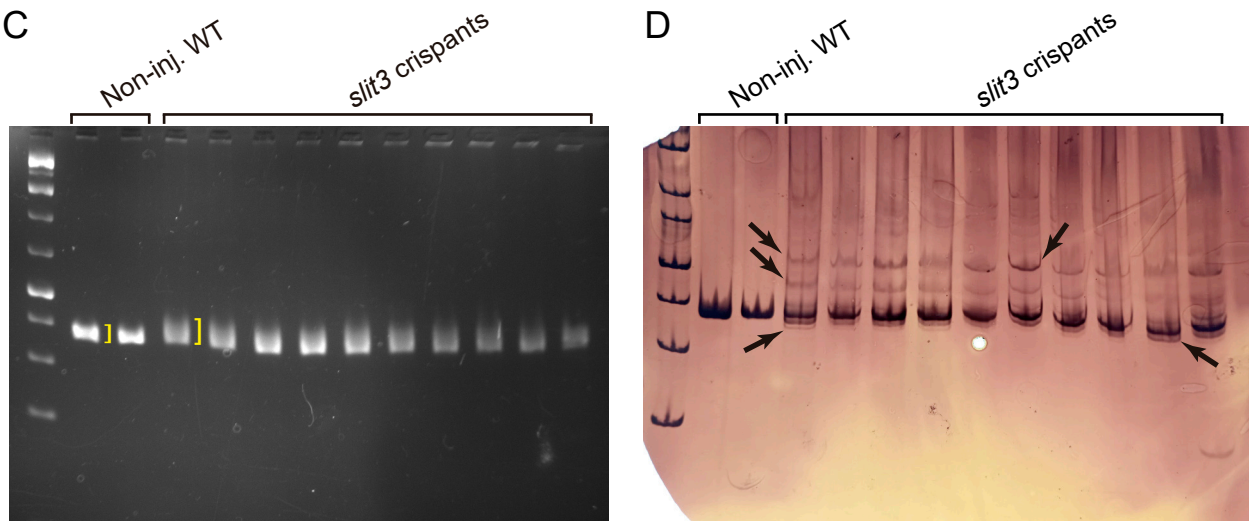

Supplement: s1 [file s1]
