# Supplementary material
Source: MDPI journal article supplement (https://www.mdpi.com/2221-3759/10/4/41)

Figure S3

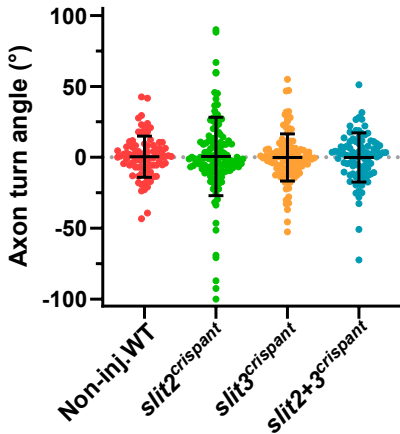

Supplement: s1 [file s1]

Figure S2

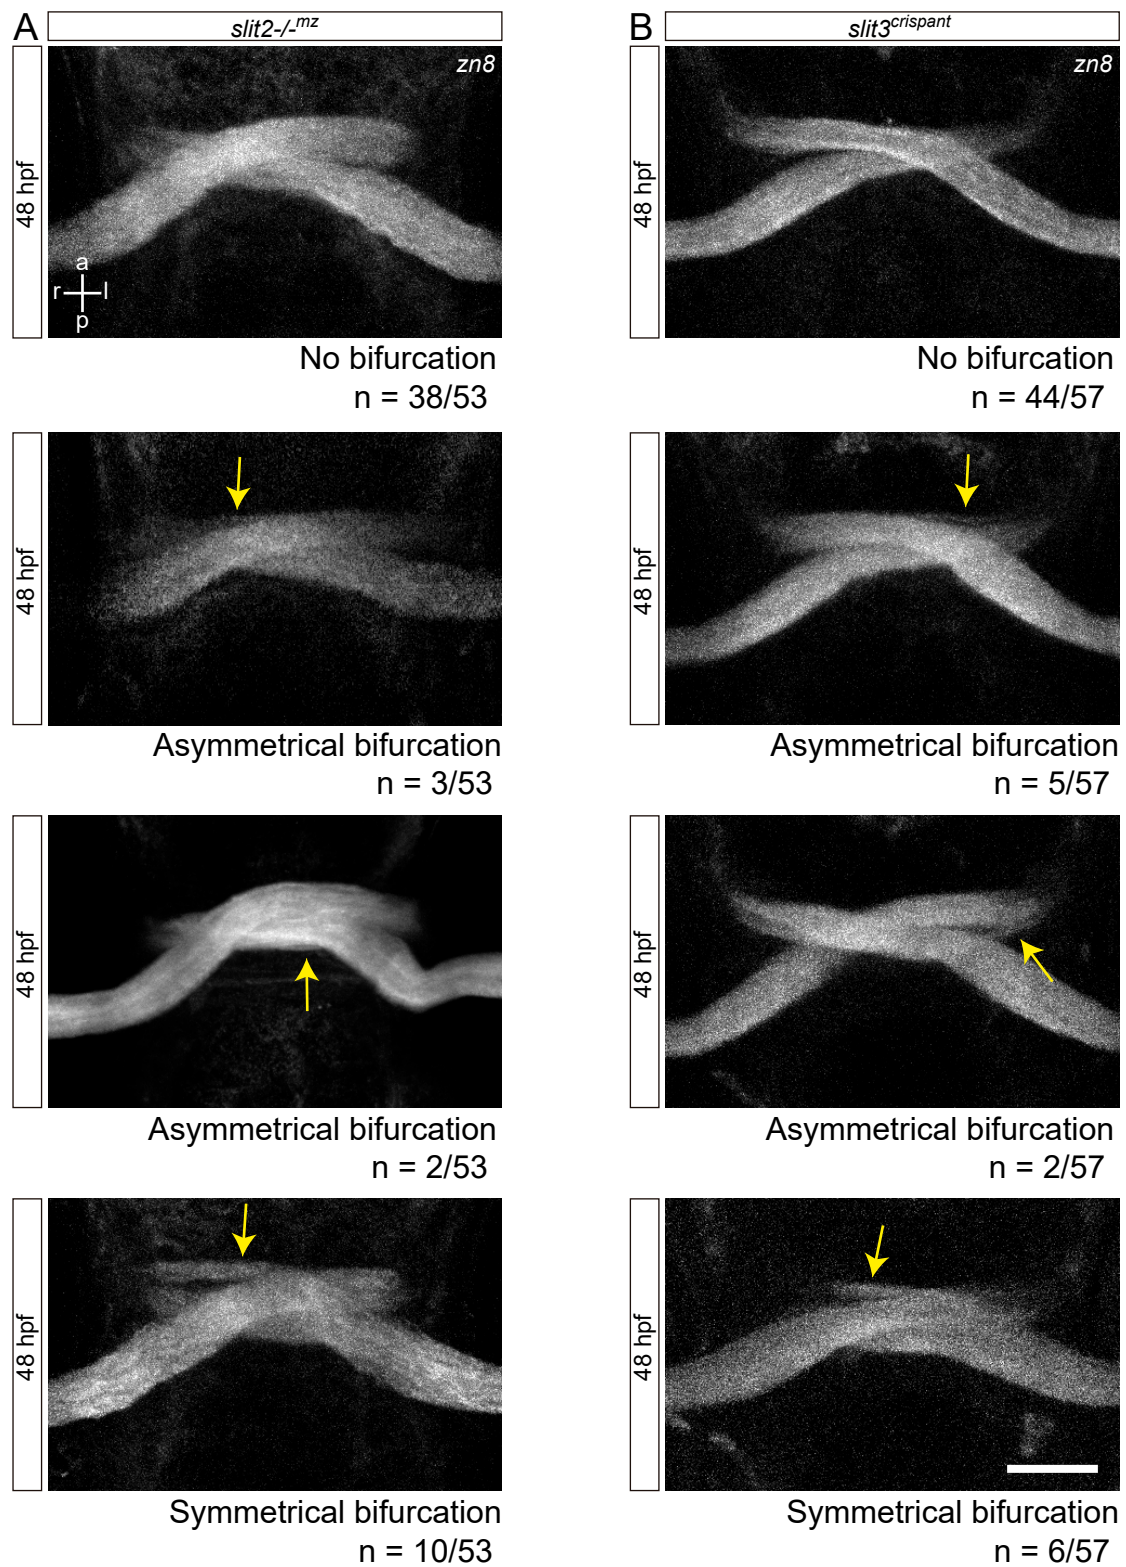

Supplement: s1 [file s1]
